# Supplementary material for: The Drosophila hematopoietic niche assembles through collective cell migration controlled by neighbor tissues and Slit-Robo signaling
Source: eLife. 2025 Jan 3;13:RP100455. doi: 10.7554/eLife.100455 (PMC11698496; doi:10.7554/eLife.100455)
Supplement: Figure 2—figure supplement 1—source data 1. [file elife-100455-fig2-figsupp2-data1.xlsx]

## Sheet: Sheet1
Analysis of UAS-grim X UAS-mCD8::GFP;AMEr-Gal4 and controls
Condition	Stage Position Number	# PSC cells L	# PSC cells R	# PSC cells total
AM-ablated	6	8	2	10
AM-ablated	7	5	4	9
AM-ablated	17	8	3	11
AM-ablated	20	4	5	9
AM-ablated	21	4	8	12
AM-ablated	32	2	3	5
AM-ablated	40	3	9	12
AM-ablated	56	5	4	9
AM-ablated	71	5	2	7
AM-ablated	3	3	8	11
AM-ablated	5	7	4	11
AM-ablated	8	5	7	12
AM-ablated	22	4	3	7
AM-ablated	27	5	5	10
AM-ablated	33	8	5	13
AM-ablated	35	5	7	12
AM-ablated	43	6	6	12
AM-ablated	23	5	4	9
AM-ablated	44	7	3	10
AM-ablated	60	5	5	10
AM-ablated	61	4	5	9
AM-ablated	64	3	4	7
AM-ablated	65	8	3	11
AM-ablated	68	10	6	16
AM-ablated	70	7	2	9
AM-ablated	10	6	4	10
AM-ablated	42	5	6	11
AM-ablated	62	5	7	12
	average	5.42857	4.78571	10.2143
Control	20	2	5	7
Control	3	5	6	11
Control	4	5	7	12
Control	11	7	4	11
Control	5	13	9	22
Control	21	6	5	11
Control	2	7	4	11
Control	6	4	5	9
Control	8	7	5	12
Control	9	5	3	8
Control	10	4	6	10
Control	13	4	7	11
Control	14	5	5	10
Control	15	3	5	8
Control	16	3	5	8
Control	18	4	5	9
Control	19	6	5	11
	average	5.29412	5.35294	10.6471
