# Supplementary material for: The Drosophila hematopoietic niche assembles through collective cell migration controlled by neighbor tissues and Slit-Robo signaling
Source: eLife. 2025 Jan 3;13:RP100455. doi: 10.7554/eLife.100455 (PMC11698496; doi:10.7554/eLife.100455)
Supplement: Figure 2—figure supplement 1—source data 2. [file elife-100455-fig2-figsupp2-data2.xlsx]

## Sheet: Sheet1
Values plotted in Panel E are "final measurement" (column D) = (E - F) / (H - G)
genotype	Embryo number	Region number	final measurement	raw Bin fluor. intensity in representative FC nucleus	raw background Bin fluor. intensity	raw background Fas3 fluor. intensity	mean Fas3 fluor. intensity of FC membranes in same region as representative FC nucleus (avg. of columns I-O)	raw Fas3 fluor. intensity FC membrane interface 1	raw Fas3 fluor. intensity FC membrane interface 2	raw Fas3 fluor. intensity FC membrane interface 3	raw Fas3 fluor. intensity FC membrane interface 4	raw Fas3 fluor. intensity FC membrane interface 5	raw Fas3 fluor. intensity FC membrane interface 6	raw Fas3 fluor. intensity FC membrane interface 7
exptl	1.2	1	0.305284	282.077	49.301	65.724	828.214	613.485	852.518	1001.91	844.945
		2	0.373116	261.39	49.301	65.724	634.151	699.598	568.704
		3	0.767307	404.572	49.301	65.724	528.734	590.88	466.588
	11	1	0.256095	142.308	58.161	74.77	403.348	265.385	541.31
		2	0.144207	85.06	58.161	74.77	261.3	252.653	338.269	192.978
		3	0.101254	141.61	58.161	74.77	898.927	835.376	962.477
	11.2	1	0.393256	155.633	55.253	71.902	327.156	334.158	320.153
		2	0.63922	478.748	55.253	71.902	734.42	746.529	722.311
		3	0.435357	216.971	55.253	71.902	443.363	401.989	484.737
	12	1	0.28859	188.113	52.467	84.495	554.525	327.157	563.81	706.975	620.16
		2	0.164174	90.073	52.467	84.495	313.557	216.88	392.94	242.159	383.058	332.75
		3	0.167142	96.687	52.467	84.495	349.061	391.587	418.496	237.1
	12.2	1	0.38717	284.177	60.333	82.602	660.756	681.418	616.7	684.149
		2	0.108156	207.858	60.333	82.602	1446.61	1748.34	1001	1590.48
		3	0.142486	152.904	60.333	82.602	732.285	841.303	671.731	683.822
	13	1	0.150292	101.164	40.589	69.626	472.674	287.583	594.559	496.761	466.398	569.427	421.316
		2	0.184718	104.155	40.589	69.626	413.75	326.156	456.903	428.975	382.781	466.579	421.106
		3	0.194317	113.534	40.589	69.626	445.018	327.304	430.07	386.078	370.616	552.628	603.41
	14	1	0.0388196	63.011	46.224	69.163	501.599	603.809	636.38	264.608
		2	0.238449	186.844	46.224	69.163	658.892	884.964	432.82
		3	0.140707	93.57	46.224	69.163	405.65	227.202	450.321	453.842	399.239	497.645
	2.2	1	0.260954	142.006	51.224	63.304	411.189	502.232	445.212	395.819	301.492
		2	0.357016	233.182	51.224	63.304	572.968	566.944	578.992
		3	0.509988	237.47	51.224	63.304	428.5	400.348	456.653
	5.2	1	0.151802	145.759	58.426	79.248	654.558	596.935	852.776	513.964
		2	0.253146	128.661	58.426	79.248	356.697	389.842	323.552
		3	0.364701	170.251	58.426	79.248	385.869	446.667	360.765	481.026	346.339	294.548
	8	1	0.210486	168.466	52.198	85.295	637.674	522.617	545.867	627.451	589.93	744.118	841.06	592.676
		2	0.333778	173.406	52.198	85.295	448.435	624.93	335.492	603.158	350.821	327.772
		3	0.231934	152.083	52.198	85.295	515.956	497.118	496.165	554.585
sibCtrl	1	1	0.536756	353.582	65.114	89.649	627.077	608.853	581.206	729.978	588.273
		2	0.261601	147.511	65.114	89.649	404.621	548.719	527.19	358.578	364.695	380.102	380.39	272.673
		3	0.297651	191.36	65.114	89.649	513.79	544.026	562.701	334.447	372.839	684.219	493.384	604.913
	10	1	0.299526	244.634	64.85	64.007	664.235	983.667	609.266	399.772
		2	0.240507	167.242	64.85	64.007	489.742	471.635	522.177	475.413
		3	0.458257	186.596	64.85	64.007	329.679	331.155	340.107	317.774
	10.2	1	0.51962	226.313	47.267	57.67	402.241	359.796	358.266	417.827	473.075
		2	0.538836	307.845	47.267	57.67	541.265	504.963	572.822	546.009
		3	0.446006	257.194	47.267	57.67	528.352	484.029	711.053	539.402	378.926
	3.2	1	0.31455	116.012	45.52	85.937	310.041	211.48	424.872	293.772
		2	0.597602	122.876	45.52	85.937	215.381	239.126	349.722	123.148	149.528
		3	0.698811	260.563	45.52	85.937	393.664	410.801	614.178	341.961	207.716
	4.2	1	0.212161	172.087	57.786	76.294	615.041	563.068	546.486	786.533	564.075
		2	0.318599	236.586	57.786	76.294	637.501	645.863	600.981	665.659
		3	0.419334	240.602	57.786	76.294	512.261	537.078	386.776	612.929
	5	1	0.424827	191.173	73.446	81.846	358.964	392.065	312.11	372.716
		2	1.2429	437.712	73.446	81.846	374.923	359.068	390.503	375.198
		3	0.650704	364.177	73.446	81.846	528.641	346.339	406.637	522.322	839.265
	6.2	1	0.856961	180.294	55.16	95.272	241.293	335.962	188.737	209.196	248.115	224.453
		2	0.375533	137.199	55.16	95.272	313.732	329.909	305.149	306.139
		3	0.711382	245.782	55.16	95.272	363.232	384.836	313.397	460.283	294.412
	7	1	0.264768	196.01	55.736	68.746	598.546	532.048	589.388	674.203
		2	0.272425	159.626	55.736	68.746	450.098	533.772	366.424
		3	0.270791	214.209	55.736	68.746	653.968	641.351	670.097	650.456
	8.2	1	1.25426	464.011	86.817	76.026	376.756	503.987	285.818	369.74	347.479
		2	1.09234	464.552	86.817	76.026	421.829	442.396	411.714	411.376
		3	1.09848	318.659	86.817	76.026	287.083	289.293	319.195	252.761
